# Supplementary material for: Comparative gene expression profile analysis of ovules provides insights into Jatropha curcas L. ovule development
Source: PubMed Central journal article supplement (PMC6828956; doi:10.1038/s41598-019-52421-0), 2019-11-04
Supplement: 41598_2019_52421_MOESM1_ESM.pdf [file 41598_2019_52421_MOESM1_ESM.pdf]

**Submitted to Scientific Reports**

**Comparative gene expression profile analysis of ovules provides insights into**

***Jatropha curcas* L. ovule development**

**Gang Xu<sup>1,4\*</sup>, Jian Huang<sup>3</sup>, Shi-kang Lei<sup>2</sup>, Xue-guang Sun<sup>1</sup>, Xue Li<sup>2</sup>**

1. Institute for Forest Resources and Environment of Guizhou, Guizhou University, Guiyang 550025, P.R. China

2. School of Life Science, Guizhou University, Guiyang, Guizhou, P.R. China

3. Key Laboratory of Green Pesticide and Agricultural Bioengineering, Ministry of Education, Center for Research and Development of Fine Chemicals of Guizhou University, Guiyang, Guizhou, P.R. China

4. Institute of Entomology, Guizhou University, Guiyang, Guizhou, P.R. China

\*Corresponding author:

Gang Xu

E-mail: xg335300@aliyun.com

## Supporting Information

Fig. S1 Length distribution of the transcripts and unigenes from the sample.

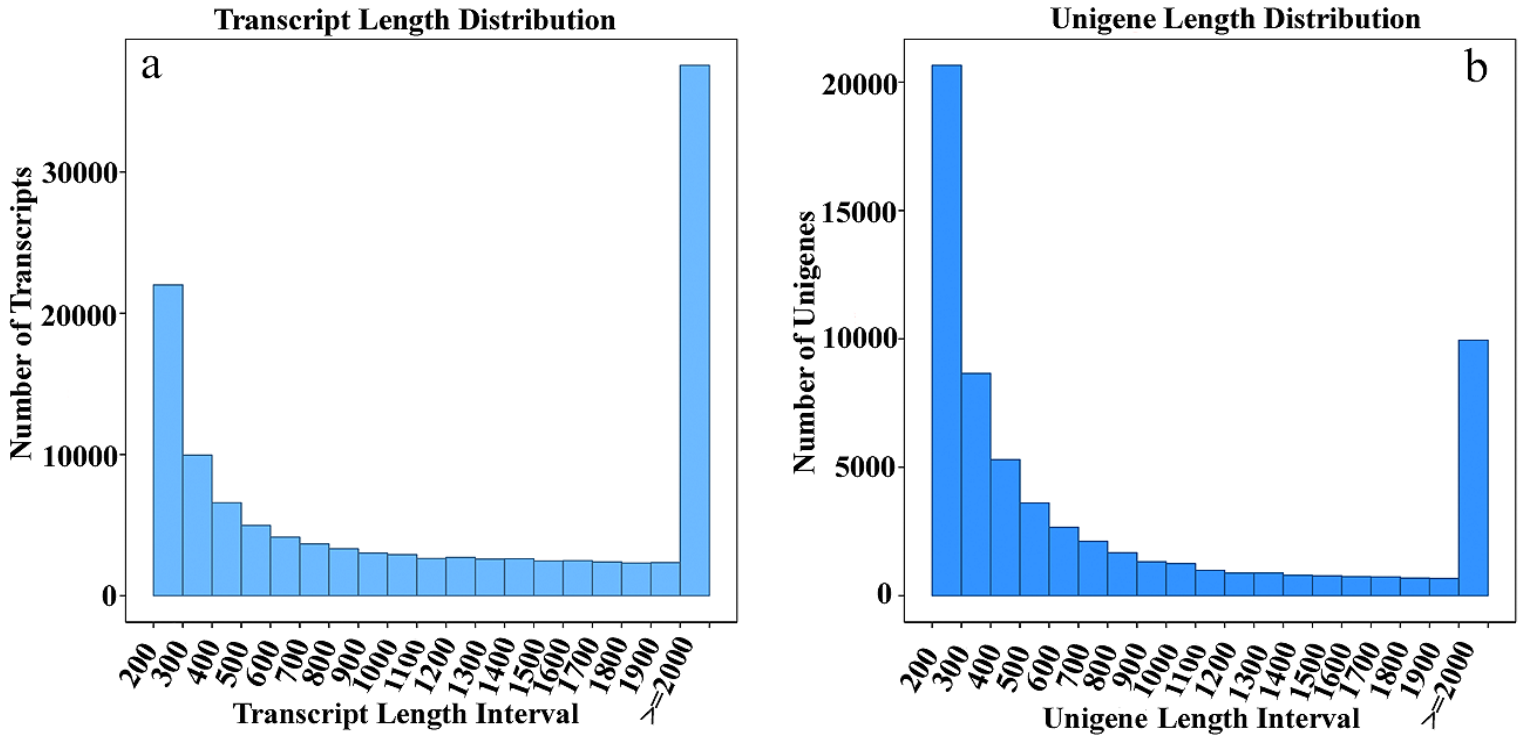

Fig. S2 Length distribution of CDS and peptides.

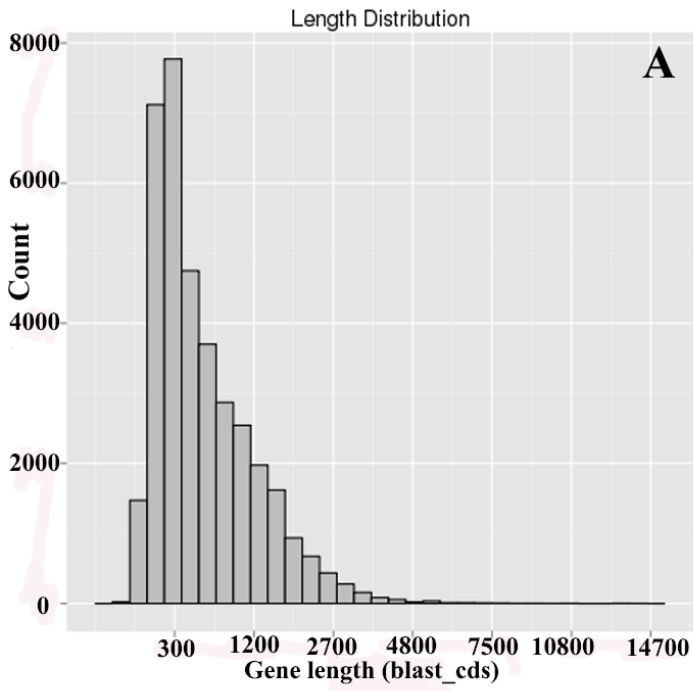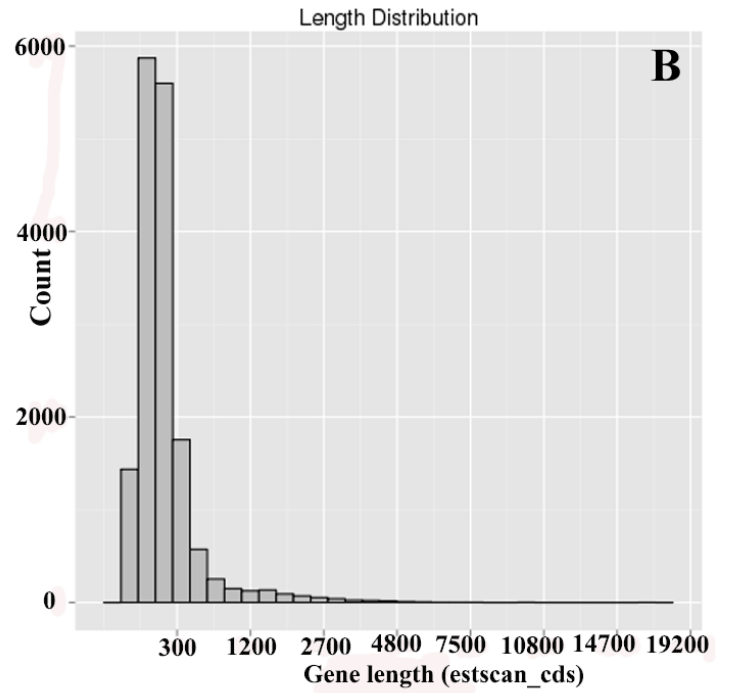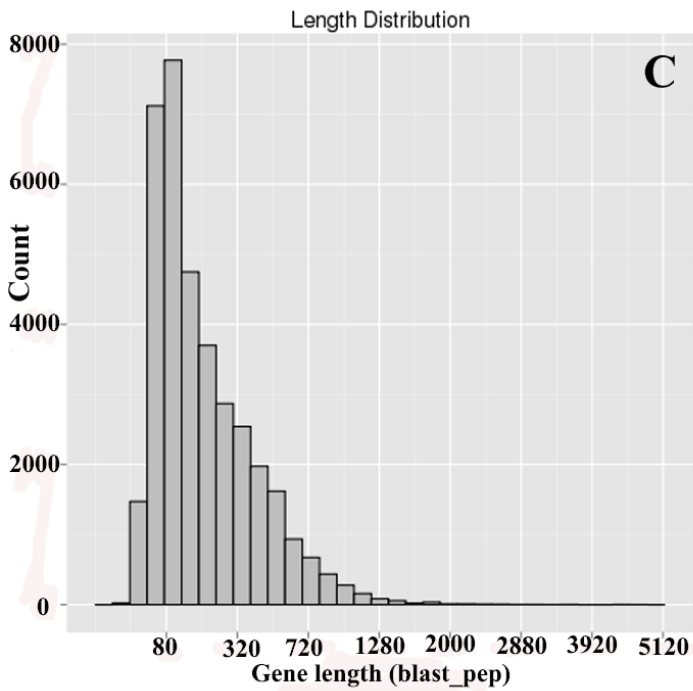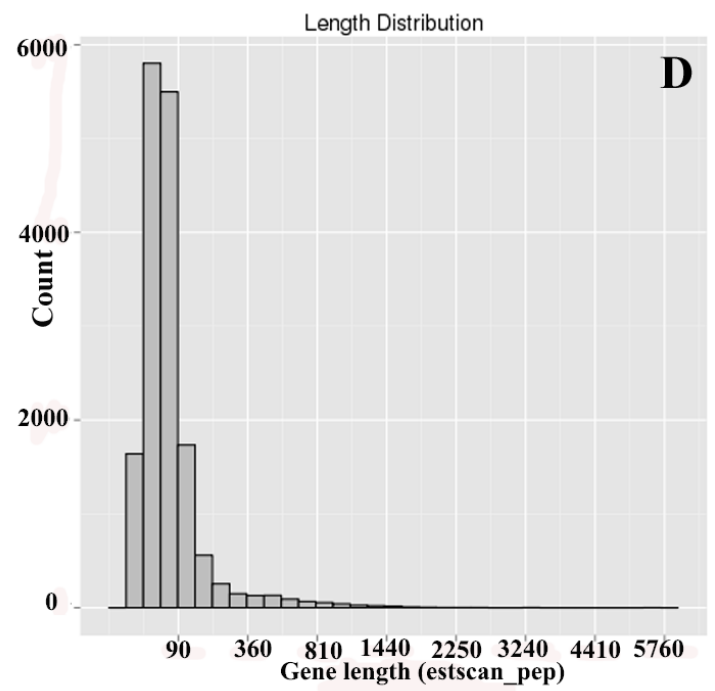

Fig. S3 Data of NR classification. (a) E-value distribution of BLAST hits for each unique sequence with a cut-off E-value of  $1.0E^{-5}$ . b) Similarity distribution of the top BLAST hits for each sequence. (c) The species distribution is shown as a percentage of the total homologous sequences, with an E-value of at least  $1.0E^{-5}$ .

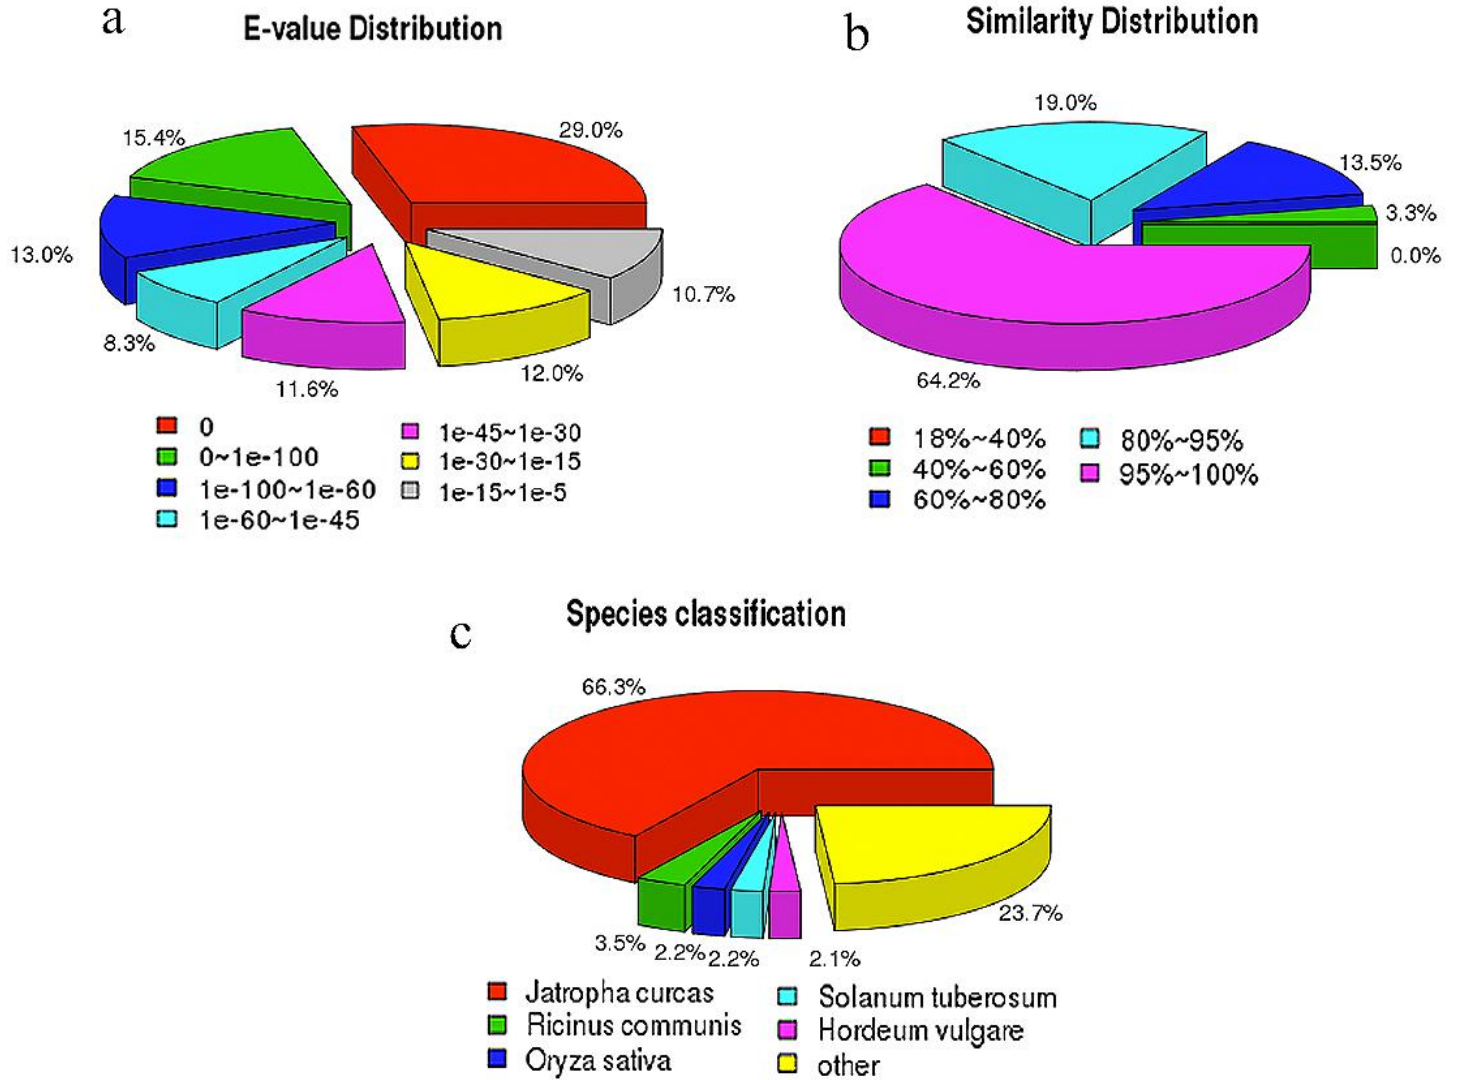

Fig.S4 KOG function classification of the Unigenes of transcriptome.

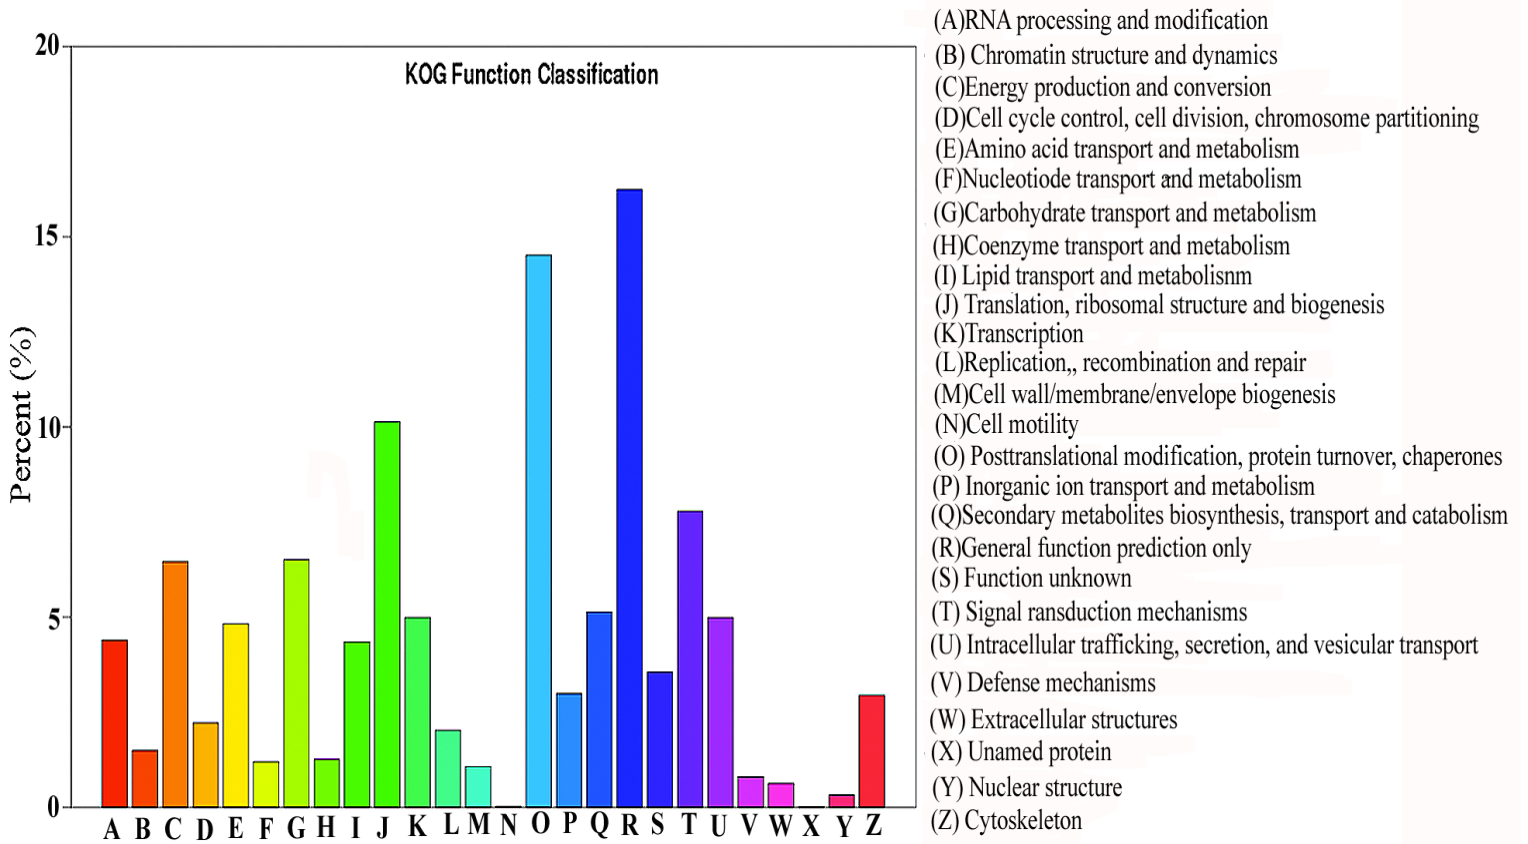

Fig.S5 GO function classification of the Unigenes of transcriptome.

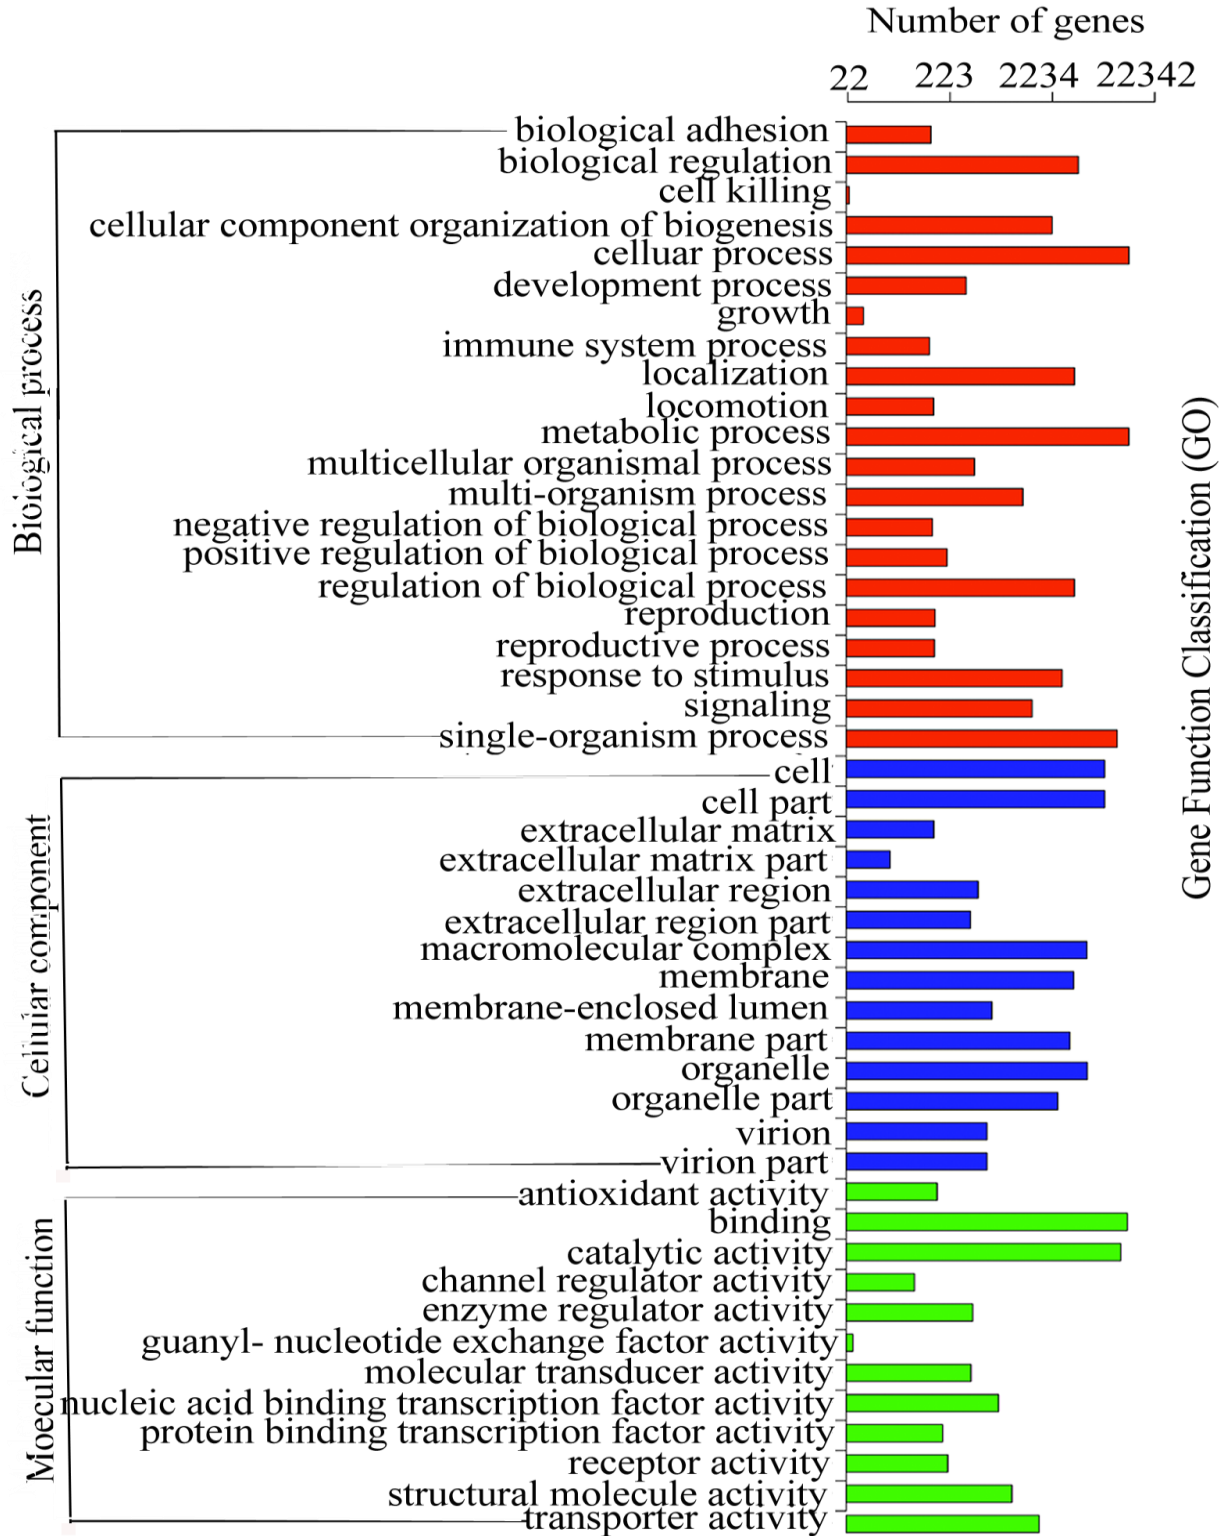

Fig.S6 KEGG pathways analysis of the Unigenes of transcriptome.

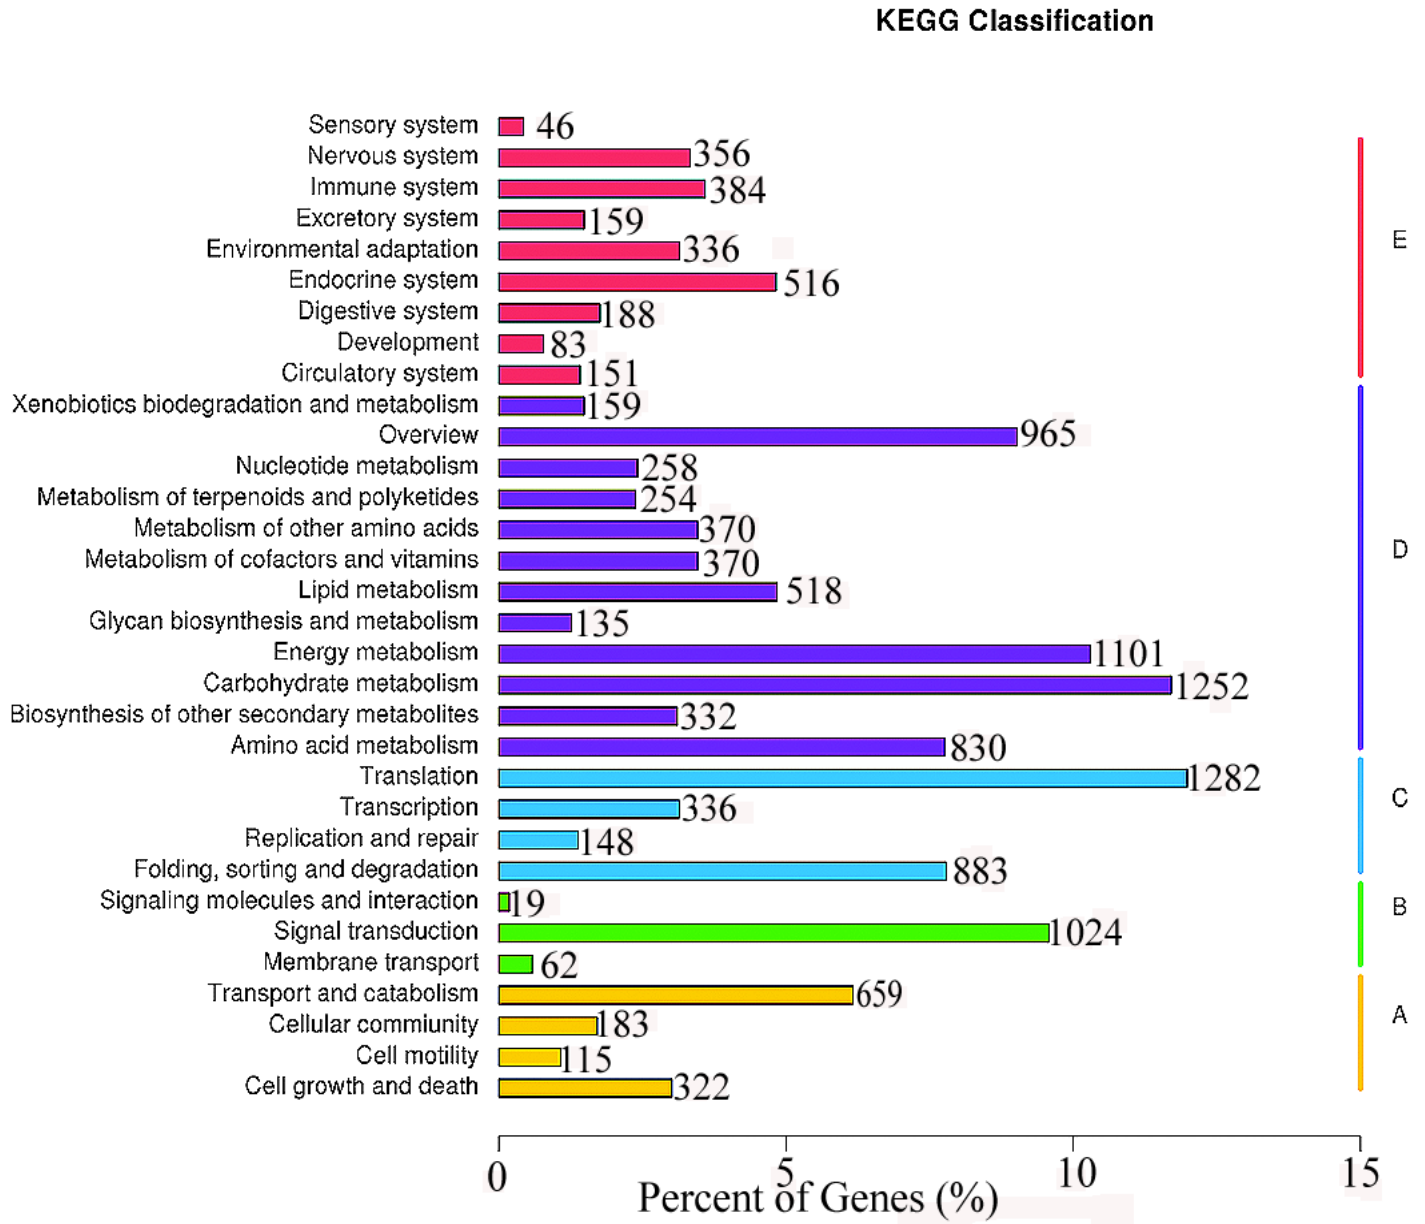

Fig. S7 Reads uniform distribution of the transcript with the distance from 5`end of the twelve samples.

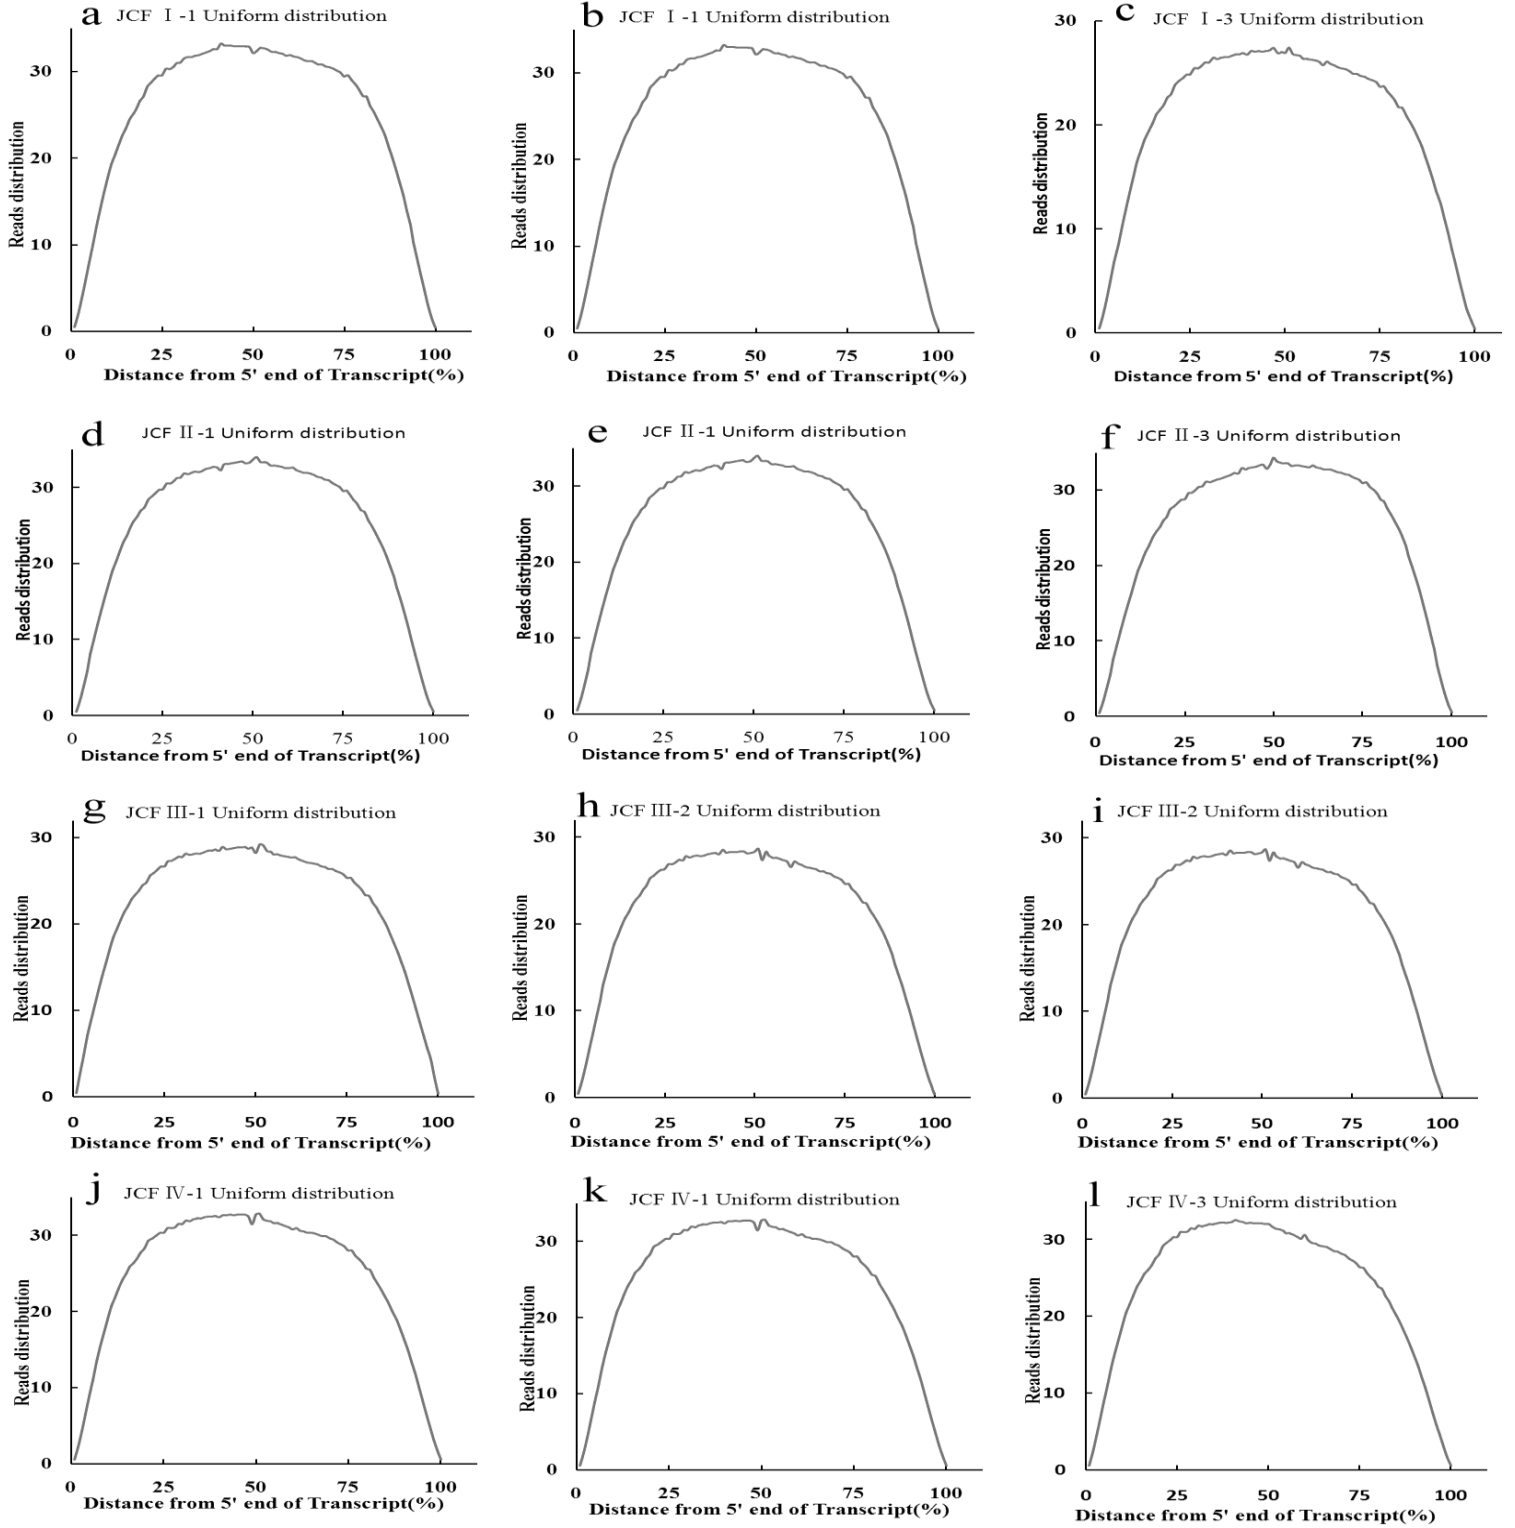



Table S1 Primers of the 15 selected unigenes and the reference gene (Tubulin beta) used for validation of expression trend.

|    | Gene ID        | Primer (5'to3')       |
|----|----------------|-----------------------|
| 1  | c28570_g1-F    | CAAAGGCCAAAAGCCCAAAGT |
|    | c28570_g1-R    | ATGCTGGCAATGTTTCGGAC  |
| 2  | c26065_g1-F    | TAGCTTCACAACCGCAAGGA  |
|    | c26065_g1-R    | ACTTACCCTGTGGACGGAGG  |
| 3  | c27617_g8-F    | TGGTCAATGGAGCACAAACC  |
|    | c27617_g8-R    | ATGCGTACCACAACCTCCGAA |
| 4  | c25603_g2-F    | CACGATTGCGTCACCTGAAT  |
|    | c25603_g2-R    | TCGACATGGCTTCTGCACT   |
| 5  | c8047_g1-F     | TCTGCAGTGATGGTGCGTCT  |
|    | c8047_g1-R     | GCCACCTTCATTCTCTCTCC  |
| 6  | c30007_g3-F    | CTGCAGTGACCGCATTTCAC  |
|    | c30007_g3-R    | CTCTGCTATGTCCGCTGCAA  |
| 7  | c29827_g2-F    | CGTGGAAGATGCGAGGTGT   |
|    | c29827_g2-R    | TCTCGCTTTCATCGACTCGG  |
| 8  | c29219_g1-F    | CCATGATGCAAACTGTCACG  |
|    | c29219_g1-R    | AATGGAGAAGCTCCCTTGGA  |
| 9  | c24288_g1-F    | ACCGCGGCTAGAGAATACGA  |
|    | c24288_g1-R    | TCGCCAAGTCACTTCTGCA   |
| 10 | c15640_g1-F    | GCGGTACCTGCTGCTTTAGG  |
|    | c15640_g1-R    | TTGTTGGCGTGAGTCGTCAT  |
| 11 | c28499_g1-F    | TCAATGGCGGATACTGGAGG  |
|    | c28499_g1-R    | AGCGTAGCCAAACTGCAAGG  |
| 12 | c11413_g1-F    | GTCGGTCACATGAGAGGCAA  |
|    | c11413_g1-R    | ACAGCCCTACGATGTGTCCA  |
| 13 | c21569_g1-F    | TTCGTTCCGATTTTTCGCTCC |
|    | c21569_g1-R    | ACACCACCTCCGGCATGAAT  |
| 14 | c25410_g1-F    | GCGCTCTATCGCCTGTTCTT  |
|    | c25410_g1-R    | ACCGACTCGAACAAGGAAGG  |
| 15 | c21626_g1-F    | CACTCATCTGTTGCCCGCTA  |
|    | c21626_g1-R    | TACTGACAACCGAACAGCCG  |
| 16 | c22538_g1-F    | TCCGGTAAGGCTGTAACCCC  |
|    | c22538_g1-R    | GCGACGCTGATGTTGCTCTT  |
| 17 | Tubulin beta-F | GCCCCACTTACTTCTCGTGG  |
|    | Tubulin beta-R | GGCAGTTAAGTAGCGGCCAT  |

Table S2 Summary of reads quality from each sample.

| Sample   | Raw Reads | Clean Reads      | Clean Bases | Error(%) | Q20(%) | Q30(%) | GC Content(%) |
|----------|-----------|------------------|-------------|----------|--------|--------|---------------|
| JCMI_1   | 30123010  | 29170474 (96.8%) | 3.65G       | 0.02     | 96.61  | 92.02  | 42.88         |
| JCMI_2   | 36069556  | 34851626 (96.6%) | 4.36G       | 0.02     | 96.37  | 91.55  | 42.87         |
| JCMI_3   | 28003324  | 27140556 (96.9%) | 3.39G       | 0.02     | 96.54  | 91.89  | 42.91         |
| JCMII_1  | 29764100  | 28813978 (96.8%) | 3.6G        | 0.02     | 95.71  | 90.33  | 42.21         |
| JCMII_2  | 32703002  | 32044924 (98.0%) | 4.01G       | 0.02     | 95.59  | 89.93  | 42.52         |
| JCMII_3  | 26663678  | 25675618 (96.3%) | 3.21G       | 0.02     | 95.71  | 90.29  | 42.38         |
| JCMIII_1 | 31655964  | 30405248 (96.0%) | 3.8G        | 0.02     | 95.94  | 90.81  | 42.24         |
| JCMIII_2 | 27334974  | 26253172 (96.0%) | 3.28G       | 0.02     | 95.87  | 90.65  | 42.14         |
| JCMIII_3 | 30949432  | 28873140 (93.3%) | 3.61G       | 0.02     | 96     | 90.83  | 42.43         |
| JCMIV_1  | 31883006  | 28199808 (88.4%) | 3.52G       | 0.02     | 95.63  | 90     | 43.29         |
| JCMIV_2  | 32853878  | 30815506 (93.8%) | 3.85G       | 0.02     | 95.63  | 90.02  | 43.6          |
| JCMIV_3  | 34772570  | 31132474 (89.5%) | 3.89G       | 0.02     | 95.6   | 90.03  | 43.39         |
| JCFI_1   | 29580132  | 29183380 (98.7%) | 3.65G       | 0.02     | 96.27  | 91.33  | 43.56         |
| JCFI_2   | 28279310  | 27047964 (95.6%) | 3.38G       | 0.02     | 96.25  | 91.29  | 43.15         |
| JCFI_3   | 24828278  | 23804096 (95.9%) | 2.98G       | 0.02     | 96.12  | 91.01  | 43.23         |
| JCFII_1  | 29899422  | 28916134 (96.7%) | 3.61G       | 0.02     | 95.93  | 90.64  | 43.06         |
| JCFII_2  | 29540294  | 29081016 (98.4%) | 3.64G       | 0.02     | 95.4   | 89.46  | 42.9          |
| JCFII_3  | 30129444  | 29132620 (96.7%) | 3.64G       | 0.02     | 96.1   | 91.02  | 42.89         |
| JCFIII_1 | 25351052  | 23639788 (93.2%) | 2.95G       | 0.02     | 95.97  | 90.77  | 42.89         |
| JCFIII_2 | 26500748  | 25380100 (95.8%) | 3.17G       | 0.02     | 96.11  | 90.98  | 43.17         |
| JCFIII_3 | 29642364  | 27769024 (93.7%) | 3.47G       | 0.02     | 96.29  | 91.37  | 43.21         |
| JCFIV_1  | 29535236  | 28382156 (96.1%) | 3.55G       | 0.02     | 95.99  | 90.78  | 42.74         |
| JCFIV_2  | 29748550  | 28839698 (96.9%) | 3.6G        | 0.02     | 95.81  | 90.41  | 42.78         |
| JCFIV_3  | 29314160  | 28701200 (97.9%) | 3.59G       | 0.02     | 95.78  | 90.29  | 43.00         |

Table S3 Distribution of transcript and unigene length.

| Transcript length interval | Number of transcripts | Number of Unigenes | Statistics of transcript length distribution | Transcripts | Unigenes   |
|----------------------------|-----------------------|--------------------|----------------------------------------------|-------------|------------|
| 200-500bp                  | 38,593                | 34,647             | min length                                   | 201         | 201        |
| 500-1kbp                   | 19,094                | 11,346             | mean length                                  | 1612        | 1000       |
| 1k-2kbp                    | 25,425                | 8,390              | median length                                | 1091        | 448        |
| >2kbp                      | 37,546                | 9,942              | max length                                   | 17391       | 17391      |
| Total                      | 120,658               | 64,325             | N50                                          | 2787        | 2146       |
|                            |                       |                    | N90                                          | 787         | 346        |
|                            |                       |                    | total nucleotides                            | 194,527,365 | 64,355,776 |

Table S4 Summary of unigene annotation.

| Data base                          | Number of Unigenes | Percentage (%) |
|------------------------------------|--------------------|----------------|
| Annotated in NR                    | 30736              | 47.78          |
| Annotated in NT                    | 25334              | 39.38          |
| Annotated in KO                    | 10696              | 16.62          |
| Annotated in SwissProt             | 22570              | 35.08          |
| Annotated in PFAM                  | 21930              | 34.09          |
| Annotated in GO                    | 22342              | 34.73          |
| Annotated in KOG                   | 12332              | 19.17          |
| Annotated in all Databases         | 5630               | 8.75           |
| Annotated in at least one Database | 36264              | 56.37          |
| Total Unigenes                     | 64325              | 100            |

Table S5 Summary of the clean reads mapped to transcription in each sample

| Sample name | Total clean reads | Total mapped     |
|-------------|-------------------|------------------|
| JCF I _1    | 29183380          | 24449388(83.78%) |
| JCF I _2    | 27047964          | 23530440(87.00%) |
| JCF I _3    | 23804096          | 20697442(86.95%) |
| JCF II _1   | 28916134          | 24919562(86.18%) |
| JCF II _2   | 29081016          | 25239518(86.79%) |
| JCF II _3   | 29132620          | 25196404(86.49%) |
| JCFIII_1    | 23639788          | 20312148(85.92%) |
| JCFIII_2    | 25380100          | 22045930(86.86%) |
| JCFIII_3    | 27769024          | 24114666(86.84%) |
| JCFIV_1     | 28382156          | 24651498(86.86%) |
| JCFIV_2     | 28839698          | 24917762(86.40%) |
| JCFIV_3     | 28701200          | 24425054(85.10%) |
